# Supplementary material for: A Comparative Transcriptome Analysis Unveils the Mechanisms of Response in Feather Degradation by Pseudomonas aeruginosa Gxun-7
Source: MDPI journal article supplement (doi:10.3390/microorganisms12040841), 2024-04-22
Supplement: s1 [file s1]

**Table S1.** Primer sequences.

| Gene ID | Gene Name | Forward primer (5'→3')     | Reverse primer (5'→3') |
|---------|-----------|----------------------------|------------------------|
| PA1656  | tssA      | ATGACCTATTTCGAGCAAGCT      | AGGATTCCCGTTGGTAGAGG   |
| PA4211  | phzB1     | ATGCCTGATACGACAAATCC       | GTTGTACCACTCCCAATCGG   |
| PA3724  | kp2       | ATGAAGAAGGTTTCTACGCT       | GTTGTGGAATTGCTCGTAGC   |
| PA5536  | dskA      | ATGACCGAACAGGAAGTCTGCT     | AGCGCTTCGTCGATCTTGTC   |
| PA4470  | fumC1     | ATGACTGACACCCGCATCGA       | AGTCCTCCTGCAGCAGTTGC   |
| PA2512  | antA      | ATGAACGCTACCCGCAGAAG       | GTTGACCAGCGCGTGCAACT   |
| PA4147  | acoR      | ATGCTTTCCGCACACTCGAA       | ATGCAGTCGCGCCACCTCTT   |
| PA1980  | eraR      | GTCCTGCTGGTGGACGATCATTTTCG | AACAGCACACGCAACTGCGG   |
| PA5417  | soxD      | GGCGAACTGCGTTCCGAAGA       | TGGCGGGTGACGTTGAAGTA   |
| PA4151  | antC      | GCGAGAAAGATCAGCTACCA       | TGGTAGAGGCCCTTGGTGAC   |
| PA2514  | phzF2     | AATCACAAAGTCGCCCTCAG       | GTAGTCCAGGCTGTAGCTGC   |

**Table S2.** Statistical table for quality control of sequencing.

| Sample Name | Raw reads | Raw Bases (bp) | Clean Bases (bp) | Clean Rate (%) | Clean Error Q20(%) | Clean Q30(%) |
|-------------|-----------|----------------|------------------|----------------|--------------------|--------------|
| Treated_3   | 30845134  | 4657615234     | 4200719637       | 0.0252         | 97.68              | 94.27        |
| Treated_2   | 29790196  | 4498319596     | 4082015281       | 0.0249         | 97.86              | 94.51        |
| Treated_1   | 29843346  | 4506345246     | 4104023137       | 0.0247         | 97.96              | 94.69        |
| Control_3   | 30785212  | 4648567012     | 4020128007       | 0.0257         | 97.41              | 93.82        |
| Control_2   | 27849154  | 4205222254     | 3587167084       | 0.0258         | 97.36              | 93.73        |
| Control_1   | 29073348  | 4390075548     | 3789502480       | 0.0257         | 97.44              | 93.84        |

**Table S3.** Relevant major genetic information in Figure 6.

| Gene  | Gene description                                            | Log <sub>2</sub> FC | up/down |
|-------|-------------------------------------------------------------|---------------------|---------|
| cysP  | sulfate-binding protein of ABC transporter                  | 1.43                | up      |
| cysU  | sulfate-binding protein of ABC transporter                  | 1.26                | up      |
| cysW  | sulfate transport protein CysW                              | 1.14                | up      |
| cysNC | Assimilatory sulfate reduction, sulfate => H <sub>2</sub> S | 0.41                | up      |
| cysC  | Assimilatory sulfate reduction, sulfate => H <sub>2</sub> S | 0.64                | up      |
| cysH  | phosphoadenylyl-sulfate reductase                           | 1.12                | up      |
| cysJ  | oxidoreductase                                              | 1.26                | up      |
| cysI  | sulfite or nitrite reductase                                | 1.61                | up      |
| cysK  | cysteine synthase A                                         | -1.02               | down    |
| gor   | glutathione reductase                                       | 1.18                | up      |
| gpx   | glutathione peroxidase                                      | 1.08                | up      |
| icd   | isocitrate dehydrogenase                                    | 1.23                | up      |
| rhII  | autoinducer synthesis protein                               | 1.36                | up      |
| lasA  | LasA protease precursor                                     | 2.67                | up      |
| lasB  | Elastase                                                    | 6.91                | up      |

**Table S4.** Analysis of amino acid species and contents before and after degradation.

| <b>Amnio acid</b> | <b>0 h/(mg/L)</b> | <b>48 h/(mg/L)</b> |
|-------------------|-------------------|--------------------|
| Val               | 5.90±0.34         | 575.89±11.26       |
| Phe               | 2.68±0.08         | 361.37±9.75        |
| Leu               | 0                 | 257.93±4.46        |
| Ile               | 0                 | 232.88±5.18        |
| Ser               | 6.24±0.22         | 134.43±1.35        |
| Gly               | 3.51±0.09         | 114.36±1.14        |
| Asp               | 2.40±0.04         | 107.13±1.19        |
| Glu               | 9.00±0.11         | 88.01±0.86         |
| Hypro             | 50.98±0.78        | 87.57±1.01         |
| Thr               | 0                 | 78.58±0.68         |
| Cys               | 0                 | 67.46±0.76         |
| Arg               | 0                 | 66.53±0.86         |
| Ala               | 6.74±0.02         | 61.50±0.47         |
| Met               | 0                 | 54.07±0.63         |
| His               | 0                 | 21.30±0.43         |
| Lys               | 0                 | 20.79±0.35         |
| Tyr               | 8.79±0.13         | 0.00               |
| Pro               | 3.11±0.02         | 0.00               |
| Total             | 99.35±3.25        | 2329.80±26.77      |

**Table S5.** Preparation table of main reagents.

| Reagent                                   | Compounding methods                                                                                                                                                                                                       |
|-------------------------------------------|---------------------------------------------------------------------------------------------------------------------------------------------------------------------------------------------------------------------------|
| 4 mol/L TCA                               | 32.678 g TCA dissolved in 50 mL water                                                                                                                                                                                     |
| 0.5 mol/L Na <sub>2</sub> CO <sub>3</sub> | 5.3 g Na <sub>2</sub> CO <sub>3</sub> dissolved in 100 mL water                                                                                                                                                           |
| 0.01 mol/L Tris-HCl (pH7.5)               | 50 mL 0.1 mol/L Tris and 40.6 mL 0.1 mol/L HCl were diluted to 500 mL, and the pH was adjusted to 7.5.                                                                                                                    |
| 2% casein                                 | 0.2 g casein was dissolved in 10 mL mixed solution containing 150 $\mu$ L 2 mol/L NaOH, 2.85 mL water and 0.01 mol/L Tris-HCl (pH 7.5 ). The pH was adjusted to 7.5.                                                      |
| Barium chromate solution                  | 1.25 g BaCrO <sub>4</sub> dissolved in 100 mL 2.5 mol/L HCl                                                                                                                                                               |
| Calcium-ammonia miscible liquids          | 0.38 g CaCl <sub>2</sub> ·2H <sub>2</sub> O dissolved in 100 mL 6 mol/L ammonia solution and kept away from light.                                                                                                        |
| Sodium mercuric chloride solution         | 1.36 g Cl <sub>4</sub> HgNa <sub>2</sub> and 0.6 g NaCl dissolved in 100 mL water, filtered                                                                                                                               |
| 1.2% Ammonium sulfamate                   | 1.2 g Ammonium sulfamate is dissolved in 100 mL of water.                                                                                                                                                                 |
| 0.02% Pararosanine hydrochloride          | 0.1 g of Pararosanine hydrochloride was dissolved in 100 mL of water, 20 mL was taken out, and mixed with HCl 1:1 to make the solution color change from red to yellow, and water was added to constant volume to 100 mL. |
| Formaldehyde-pararosanine solution        | 0.2 % formaldehyde solution and 0.02 % pararosanine hydrochloride solution were mixed in equal volume.                                                                                                                    |
| 10 mol/L DTNB                             | 0.396 g DTNB was dissolved in 100 mL pH 7.0 PBS buffer and stored at 4 °C in dark.                                                                                                                                        |

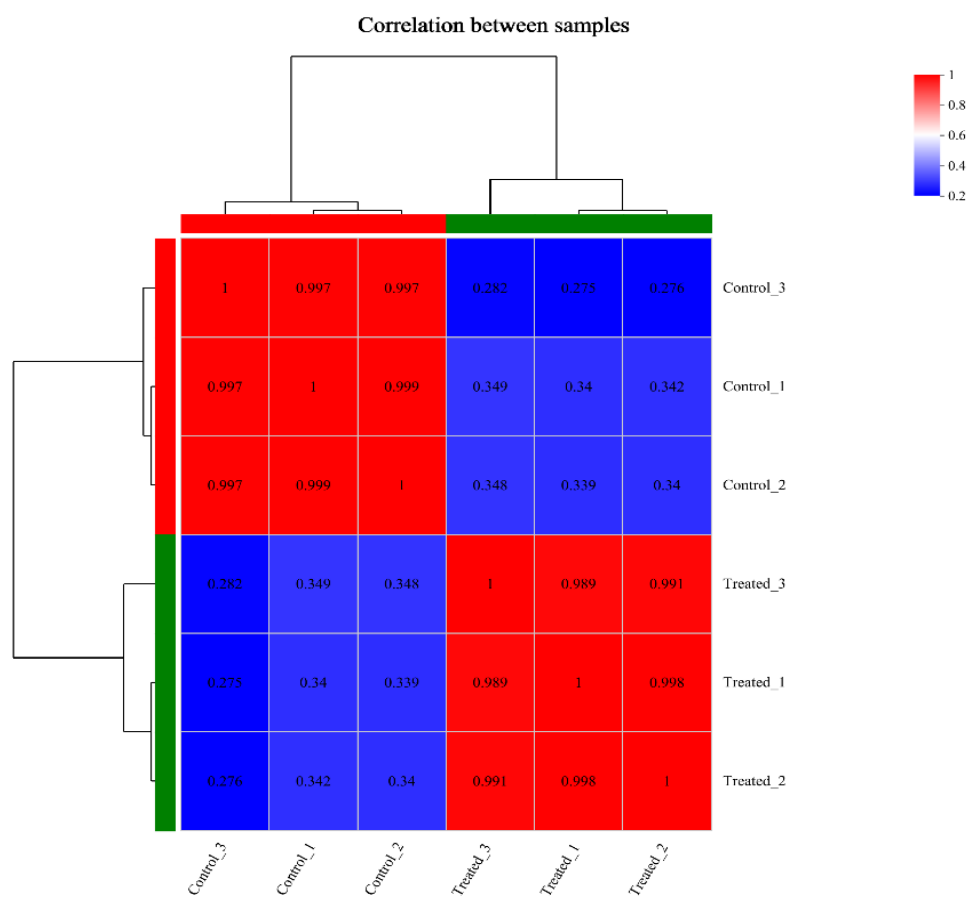

**Figure S1.** An analysis of the sample correlation heat map. The distance between each sample point indicates the similarity between samples, with closer distances suggesting higher similarity. The horizontal axis represents the contribution of the first principal component (PC1) in distinguishing samples, while the vertical axis represents the contribution of the second principal component (PC2) in distinguishing samples.

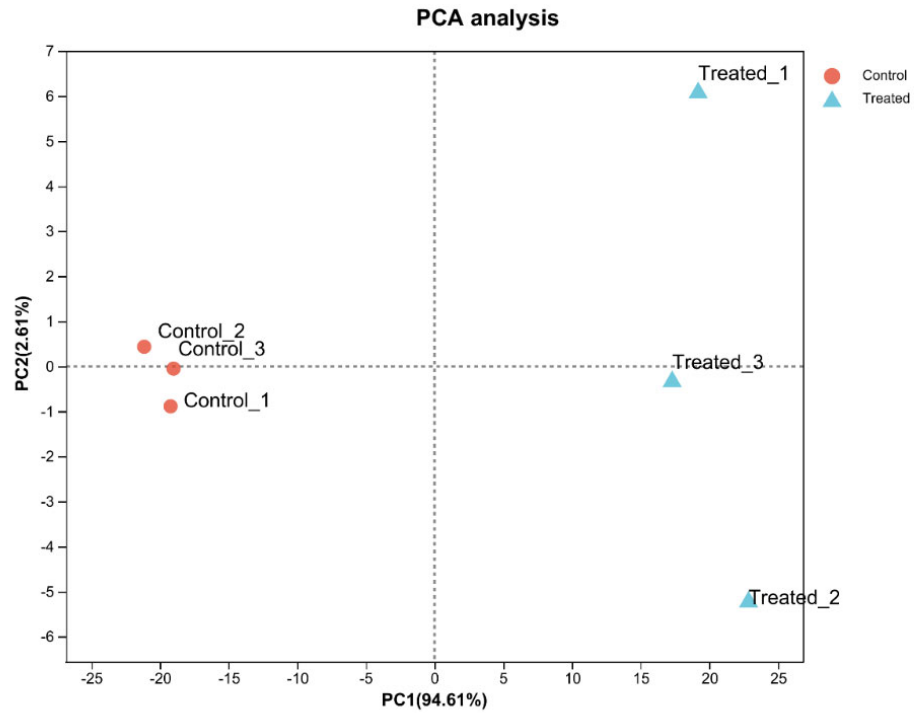

**Figure S2.** Principal Component Analysis (PCA) correlation analysis was conducted to examine the correlation levels between samples. In the figure, sample names are displayed on both the right and lower sides, while sample clustering is shown on the left and upper sides. The squares in varying colors indicate the correlation levels between the pairs of samples.

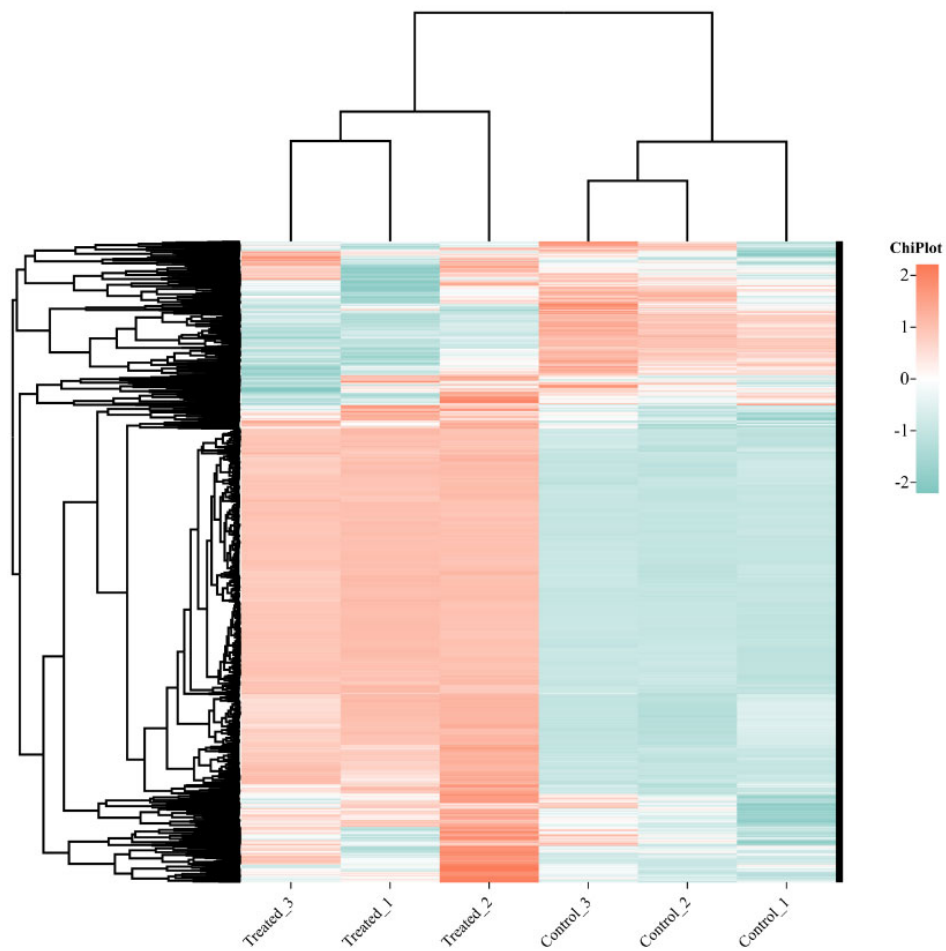

**Figure S3.** Gene cluster heatmap analysis. Each column represents a sample, and each row represents a gene. The heat map uses color depth to represent the gene's expression level in each sample. On the left side of the diagram, a tree diagram illustrates gene clustering. The closer the branches of two gene clusters are, the more similar their expression levels are. At the top of the diagram, another tree diagram displays sample clustering, with color blocks representing different groups. At the bottom, sample labels are displayed. The closer the branches of two sample clusters are, the more similar the expression patterns of all the genes in the samples are, indicating a closer trend in the changes of gene expression levels.

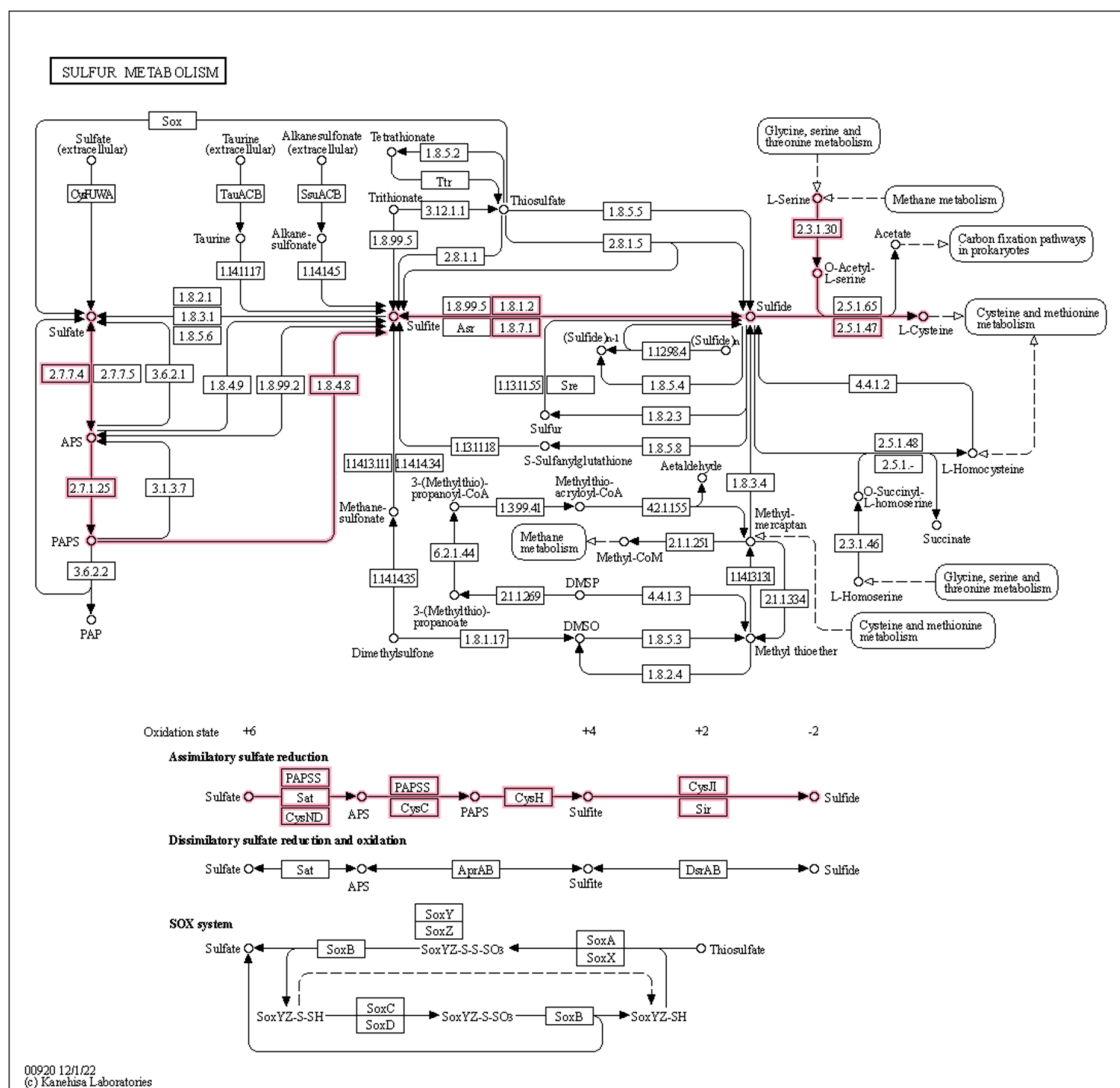

**Figure S4.** Schematic representation of sulfite metabolism.
